# Supplementary material
Source: ML conference proceedings conference paper supplement (https://openreview.net/forum?id=tqnkPOd_7h)
Supplement: supplementary_material [file attachment]

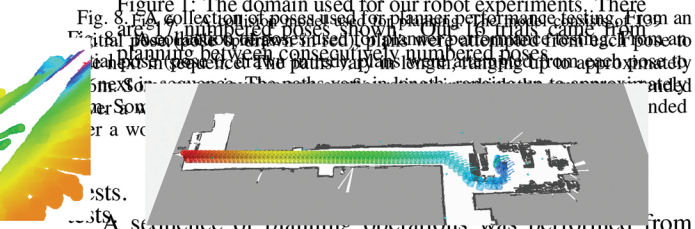

Figure 8: A visualization of a path found by our planner. The path is shown as a sequence of colored points (red, orange, yellow, green, blue) moving through a 3D environment with various obstacles. The path starts from a red point on the left and ends at a blue point on the right, navigating around several grey rectangular blocks. The background is a light blue sky with some clouds.

but it is likely that a GPU variant could significantly improve performance without requiring any exotic techniques. In any case, the slope of each individual curve, while the effect of increasing the margin, is adapted up to a point, compares favorably with the 10-15s required to initialize the distance field used in our implementation. In these startup overhead comparisons, we improved the 10-15s and the highest speedup is achieved by increasing both the large point cloud collected for these experiments (~1M points over a volume spanning  $40m \times 21m \times 2m$ ).

## Grid Search Domain

### B. View Selection

In these experiments, we ran our planner on a much larger set of trials while varying important parameters such as  $\epsilon$ ,  $w$ , the number of threads, and the time it takes to expand a state. We investigate how each of these parameters affects the performance of our planner. We ran these trials on a simple 2D grid domain with obstacles and there is little penalty for selecting too many views. While the mark database (Sturtevant 2012) four kinds of maps each represent a quarter of the set (Figure 4). We ran one trial for observed locations as not only one, coverage of intervening
