# Supplementary material
Source: ML conference proceedings conference paper supplement (https://openreview.net/forum?id=tqnkPOd_7h)

WIS ( $\rho$ : 0.762 )

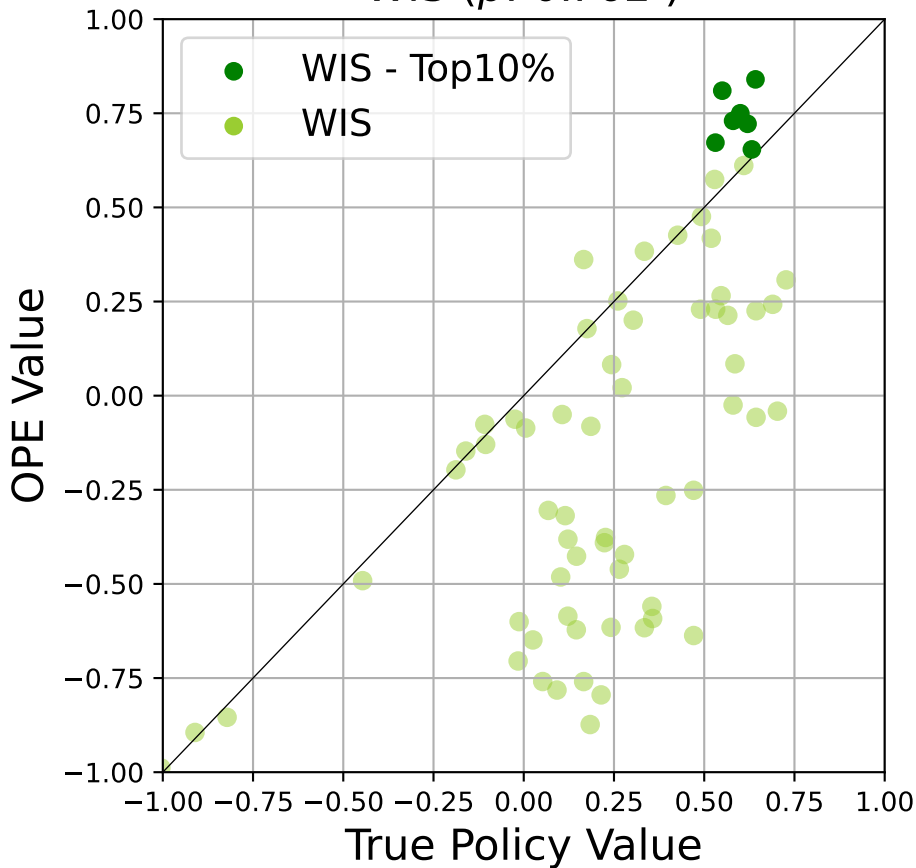

Supplement: supplementary_material [file attachment]

# Regret Top-3

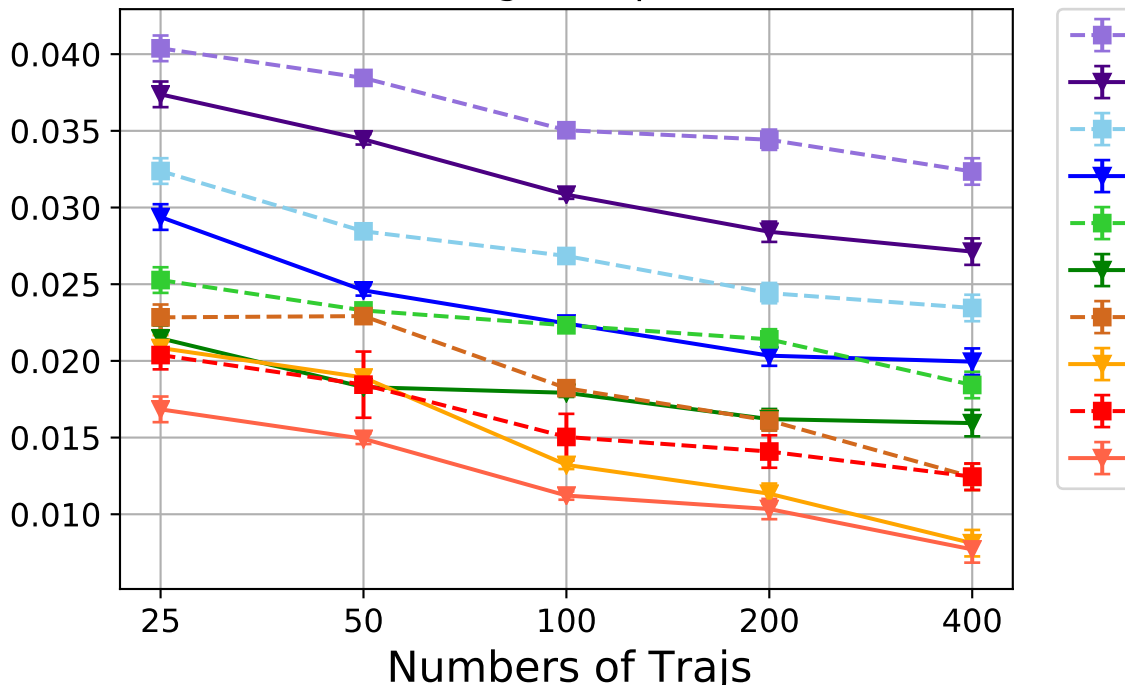

Supplement: supplementary_material [file attachment]

FQE ( $\rho: 0.821$  )

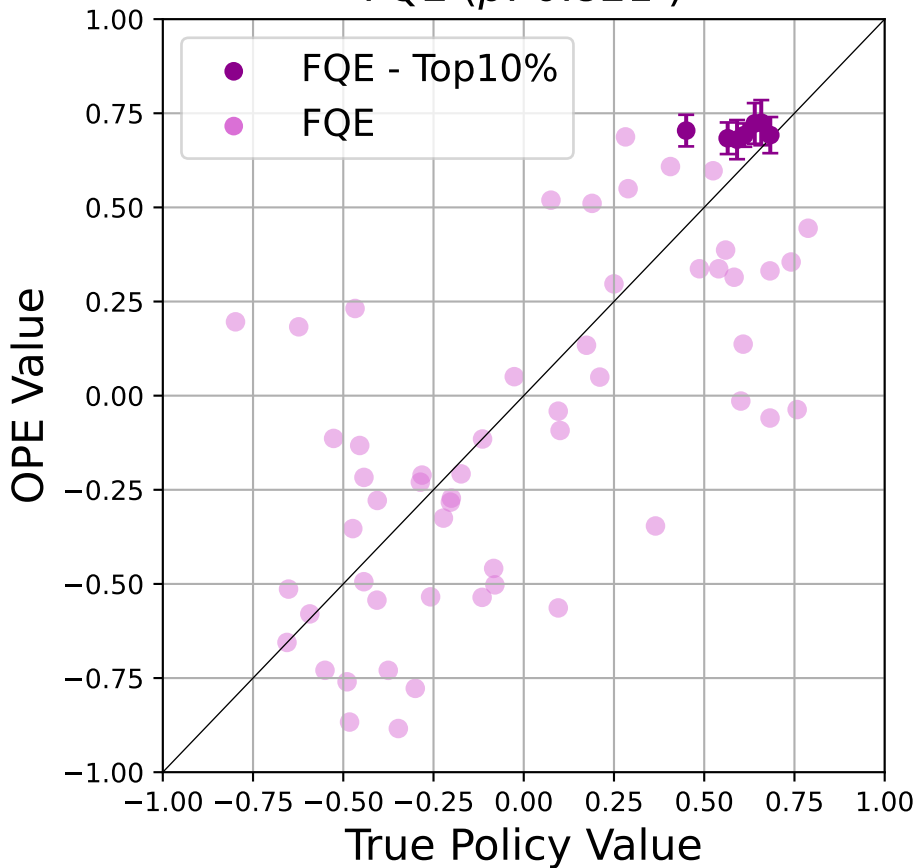

Supplement: supplementary_material [file attachment]

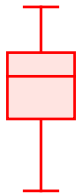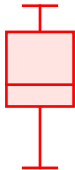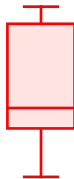

Supplement: supplementary_material [file attachment]

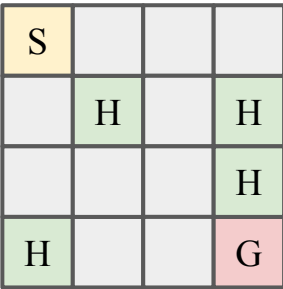

(a)

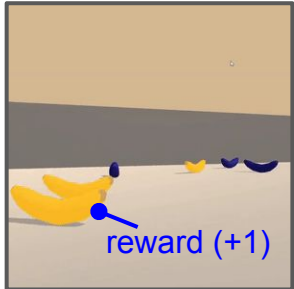

(b)

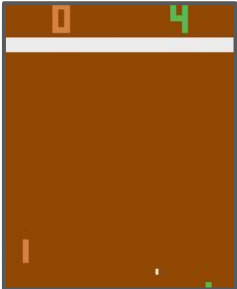

(c)

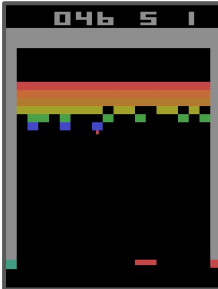

(d)

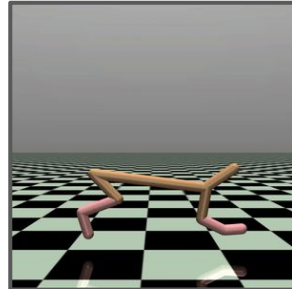

(e)

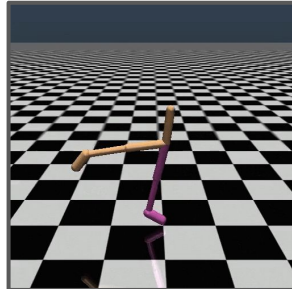

(f)

Supplement: supplementary_material [file attachment]

AM ( $\rho$ : 0.609 )

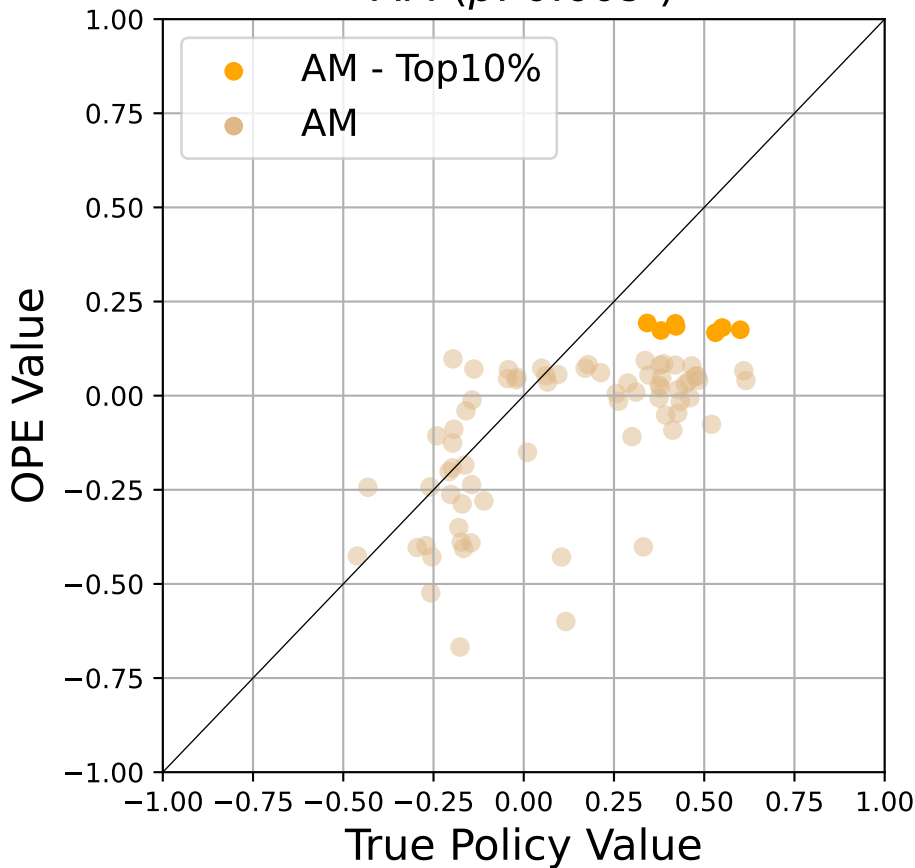

Supplement: supplementary_material [file attachment]

PMS ( $\rho: 0.895$ )

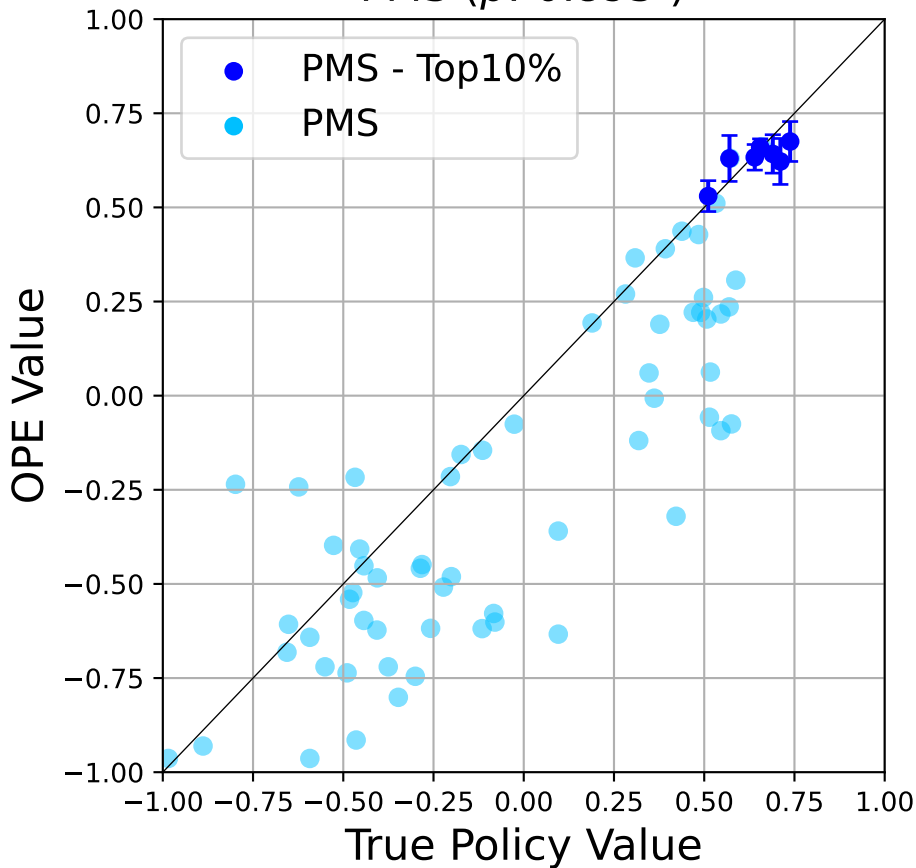

Supplement: supplementary_material [file attachment]

FQE ( $\rho: 0.821$  )

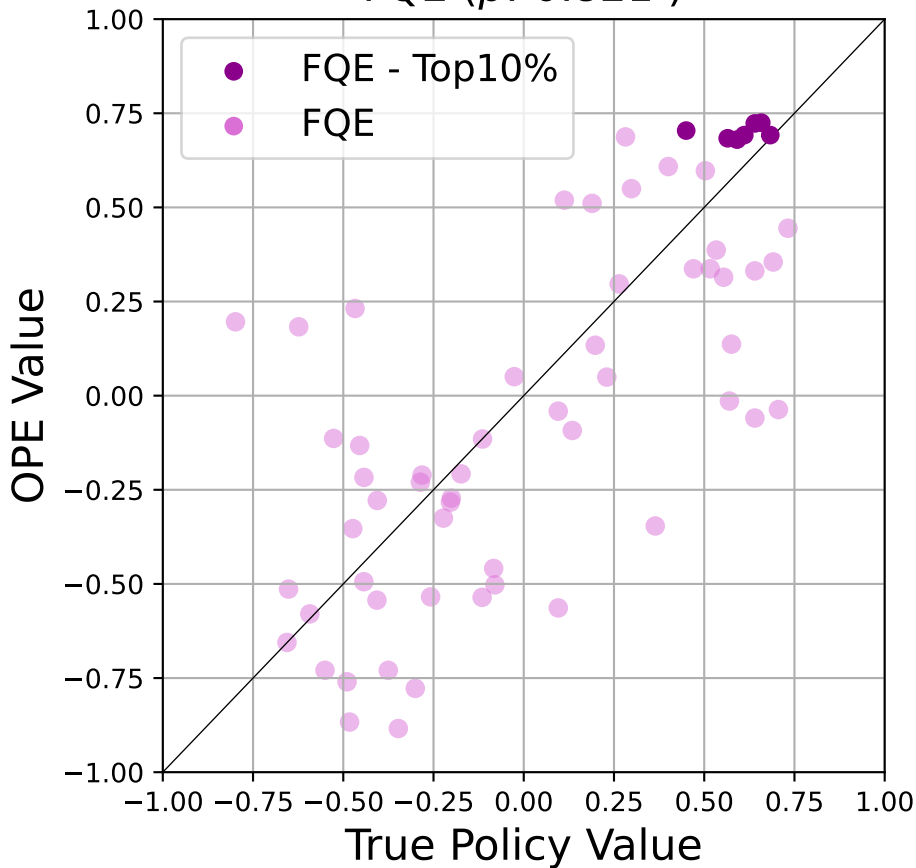

Supplement: supplementary_material [file attachment]

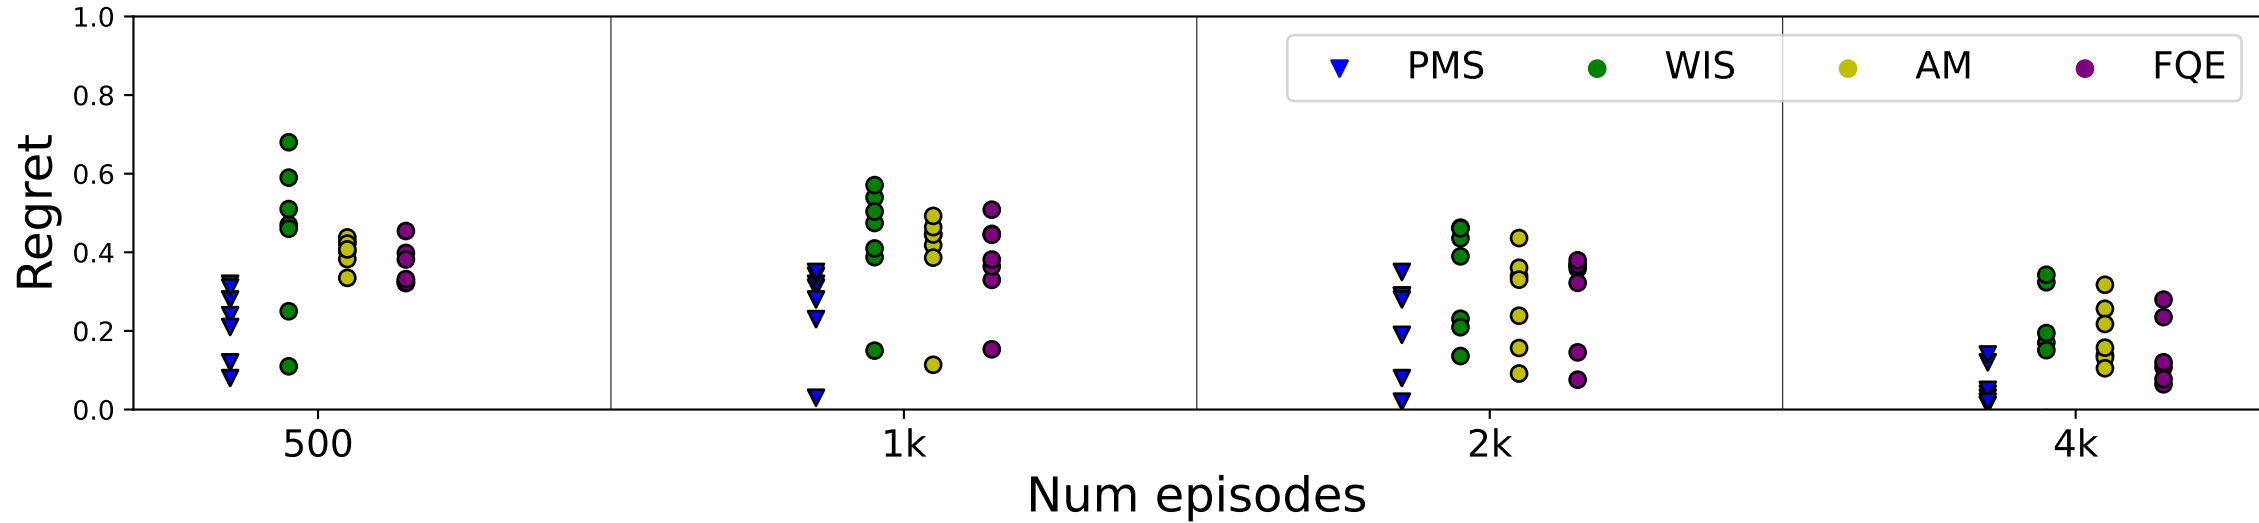

Supplement: supplementary_material [file attachment]

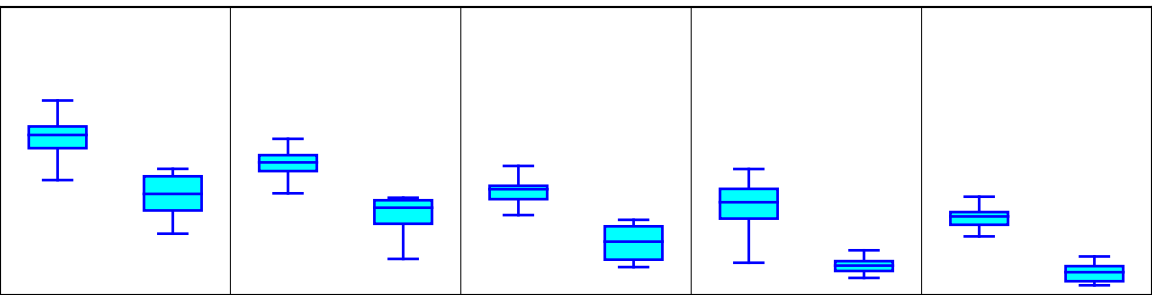

Supplement: supplementary_material [file attachment]

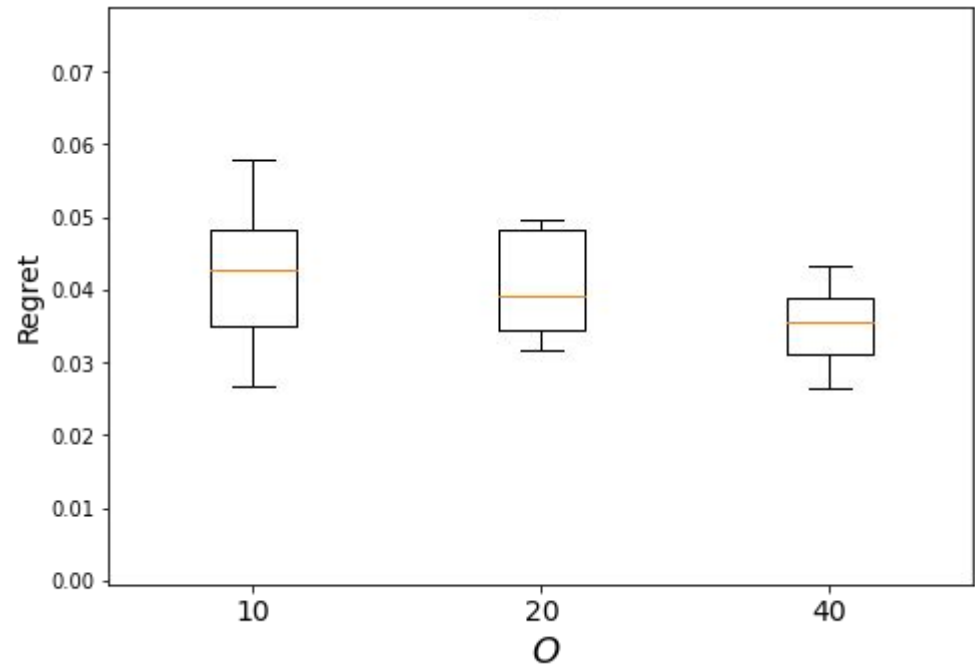

Supplement: supplementary_material [file attachment]

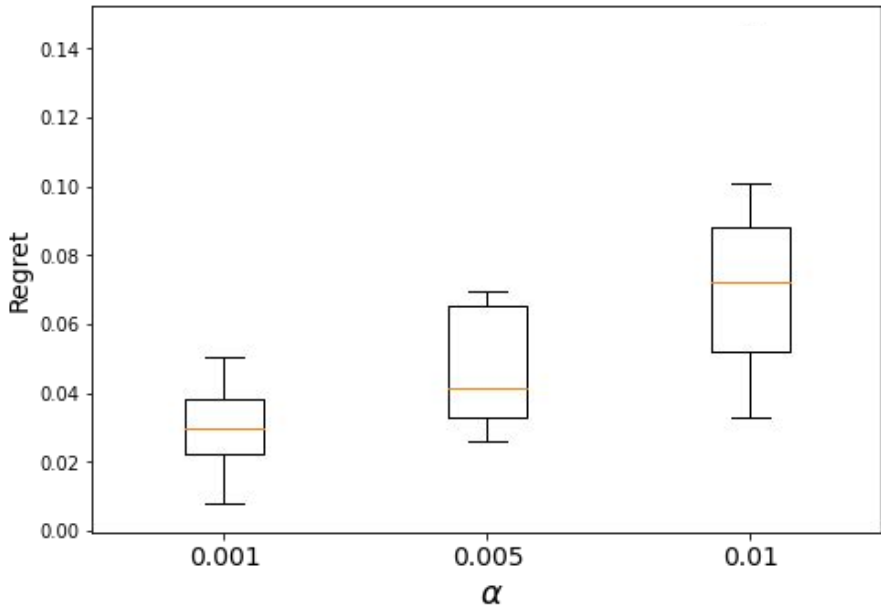

Supplement: supplementary_material [file attachment]

× best selected policy  $\pi^*$

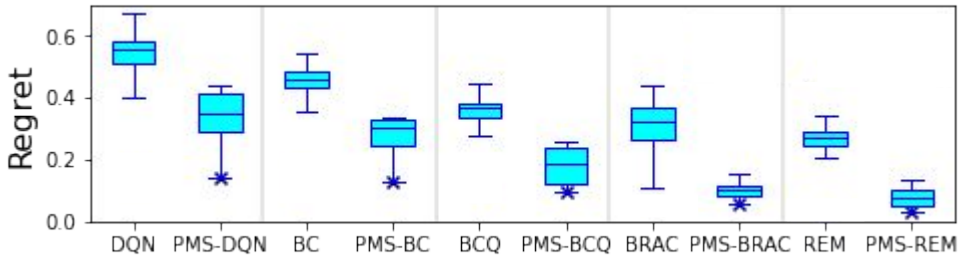

Supplement: supplementary_material [file attachment]



(a)

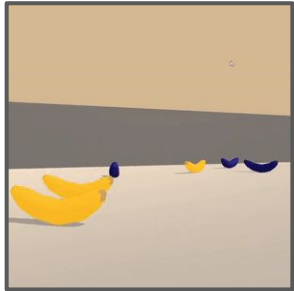

(b)

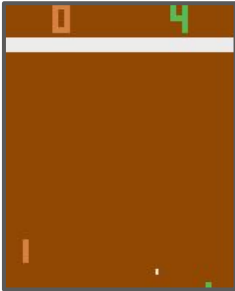

(c)

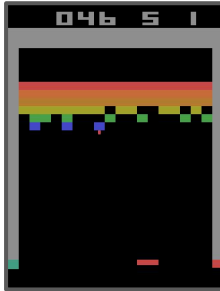

(d)

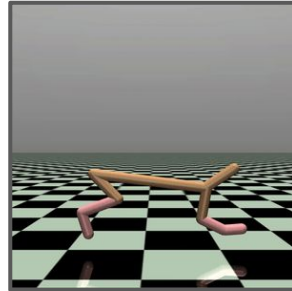

(e)

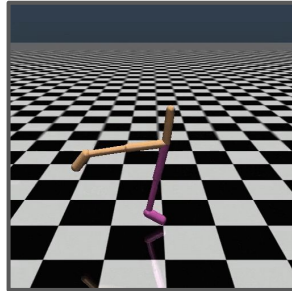

(f)

Supplement: supplementary_material [file attachment]
